# Supplementary material
Source: PubMed Central journal article supplement (PMC8494240)
Supplement: NIHMS1704634-supplement-Supporting_Information.pdf [file NIHMS1704634-supplement-Supporting_Information.pdf]

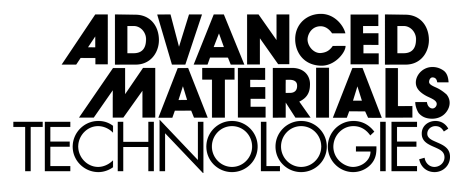

## Supporting Information

for *Adv. Mater. Technol.*, DOI: 10.1002/admt.202100149

The Materials Science Foundation Supporting  
the Microfabrication of Reliable Polyimide–Metal  
Neuroelectronic Interfaces

*Cary A. Kuliasha\* and Jack W. Judy*

## Supporting Information

**The Materials Science Foundation Behind Microfabricating Reliable Polyimide-Metal Neuroelectronic Interfaces**

*Cary A. Kuliasha*<sup>1,2(\*)</sup> and *Jack W. Judy*<sup>1,2</sup>

**S1 Metal Resistivity Measurements**

Each four-point probe metal resistivity test-structure consists of a 400 nm thick, 10-cm-long metal trace fit to a small (~1250  $\mu\text{m}$  x 1650  $\mu\text{m}$ ) footprint using forty 180° switchbacks spaced 15  $\mu\text{m}$  apart (edge-to-edge) (**Figure S1**). Two rectangular contact pads (200  $\mu\text{m}$  in diameter) at each end of the trace were designed for micropositioner probe tips, and the top polyimide, a-SiC, and titanium were dry etched at the contact sites to reveal bare metal (platinum, gold, or platinum silicide). Seven different test-structures were designed for each metal stack cohort with metal trace widths ranging from 4 to 10  $\mu\text{m}$ . Average (standard deviation) resistivity was determined between the seven different test-structure designs on at least two different wafers ( $N = 2$ ,  $n = 14$ ).

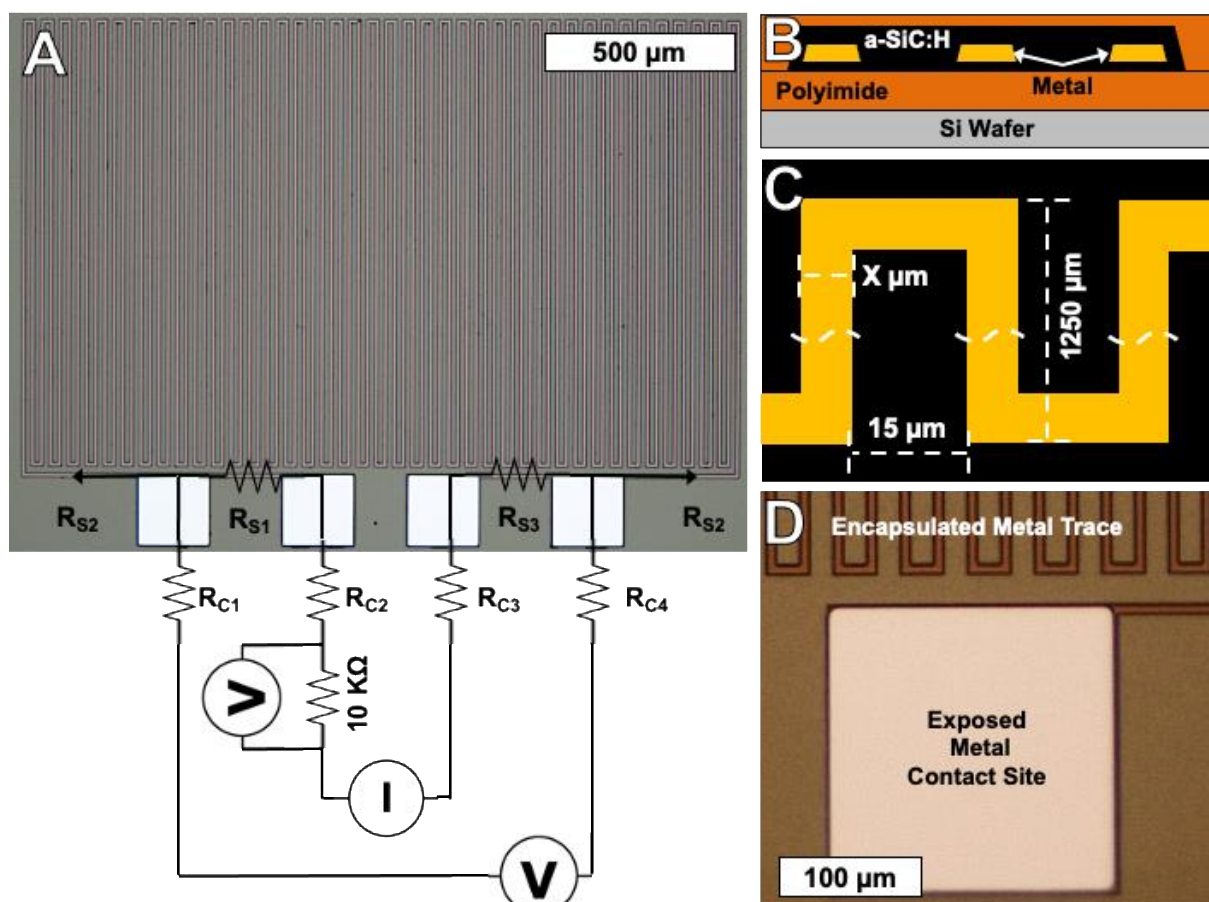

**Figure S1.** 4-point probe test-structures used for resistivity calculations (Figure 9). (A) Top-down optical image of test-structure showing the switchback metal path starting/ending at two contact pads each. The circuit schematic used to calculate the resistivity is overlaid. (B) Cross-sectional schematic showing the polyimide and a-SiC:H encapsulation around each metal trace. Each polyimide layer is 5  $\mu\text{m}$  thick, and the a-SiC:H film is approximately 500 nm thick with 250 nm above and below the metal stack (C) Top-down schematic showing the metallic trace switchback geometry with X varying from 4 to 10  $\mu\text{m}$ . (D) Top-down optical image showing an exposed metal contact site used to electrically connect with the metal traces using the micropositioner probe tips.

## S2 Polyimide Curing and Surface Modification

ATR-FTIR analysis was used to track changes in the polyimide film after thermal curing (**Figure S2**). Films cured to 120  $^{\circ}\text{C}$  do not show any significant imide peaks because no widespread imidization has occurred after the low temperature soft-bake. However at 250  $^{\circ}\text{C}$ , there are numerous examples of imide peaks, and comparing to the 450  $^{\circ}\text{C}$  peaks, there is no significant change in the peak shape or height indicating that imidization is almost fully completed between 120 to 250  $^{\circ}\text{C}$ .

## FTIR: PI Cure Temperature

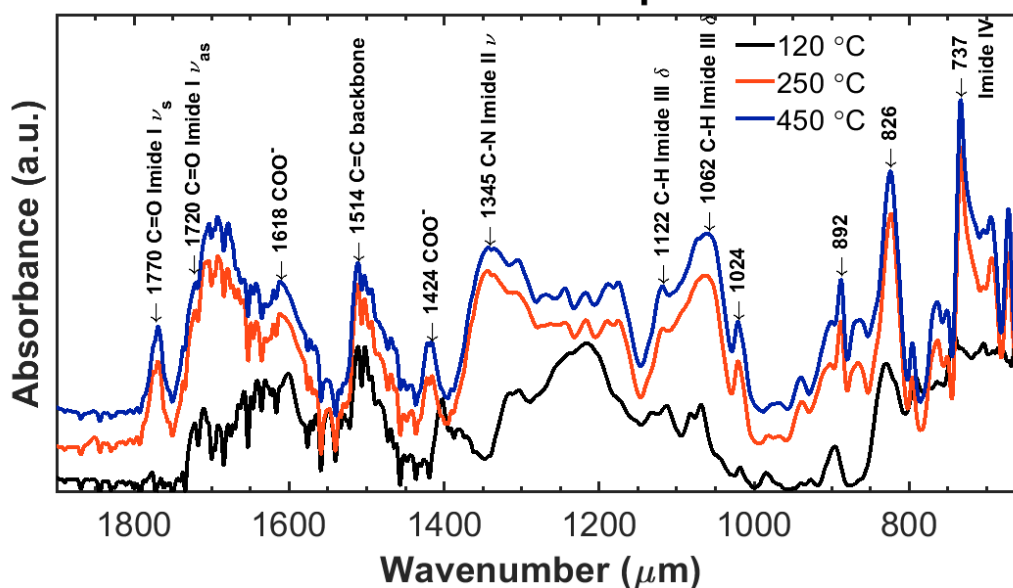

**Figure S2.** FTIR spectra of polyimide films after thermally curing to the indicated maximum temperatures. Spectra are shifted along the Y-axis slightly to allow for easy comparison between each. Peak identifications are included to highlight the appearance of several imide peaks after curing to 250 °C that do not appreciably change when curing to 450 °C indicating that the film is fully imidized at 250 °C.

## S3 a-SiC:H Deposition and Surface Modification

Depth profiling through 250nm-thick a-SiC:H films on Si wafers was used to confirm the absence of any significant oxygen and the film stoichiometry (50% Si, 50% C) (**Figure S3 A**). The thin native oxide layer is only detectable within the top few nm of the film. Transmission FTIR spectroscopy was used to confirm that the a-SiC:H films were indeed SiC without the formation of other significant polytypes likely to arise from the precursor gases used (**Figure S3 B**).

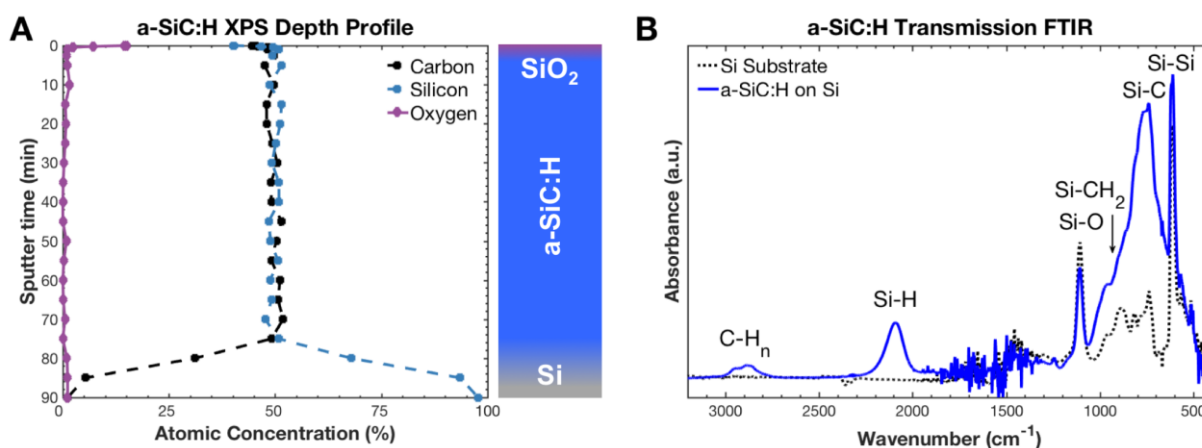

**Figure S3.** (A) XPS depth profiling of 250 nm thick stoichiometric a-SiC:H film on Si wafer, and (B) transmission FTIR spectra of stoichiometric a-SiC:H film with included peak IDs. Si–Si and Si–O peaks are primarily from the Si wafer substrate.

#### S4 Metal Deposition and Lift-Off

During microfabrication of thin-film polyimide-metal devices, sporadic delamination of metal structures was evidenced during the lift-off process when only titanium was used as the tie-layer between the metal structures and the underlying polyimide substrate (**Figure S4**). This problem was eliminated when using tie-layers (e.g., chromium, a-SiC:H) that had significantly higher adhesion with the underlying polyimide.

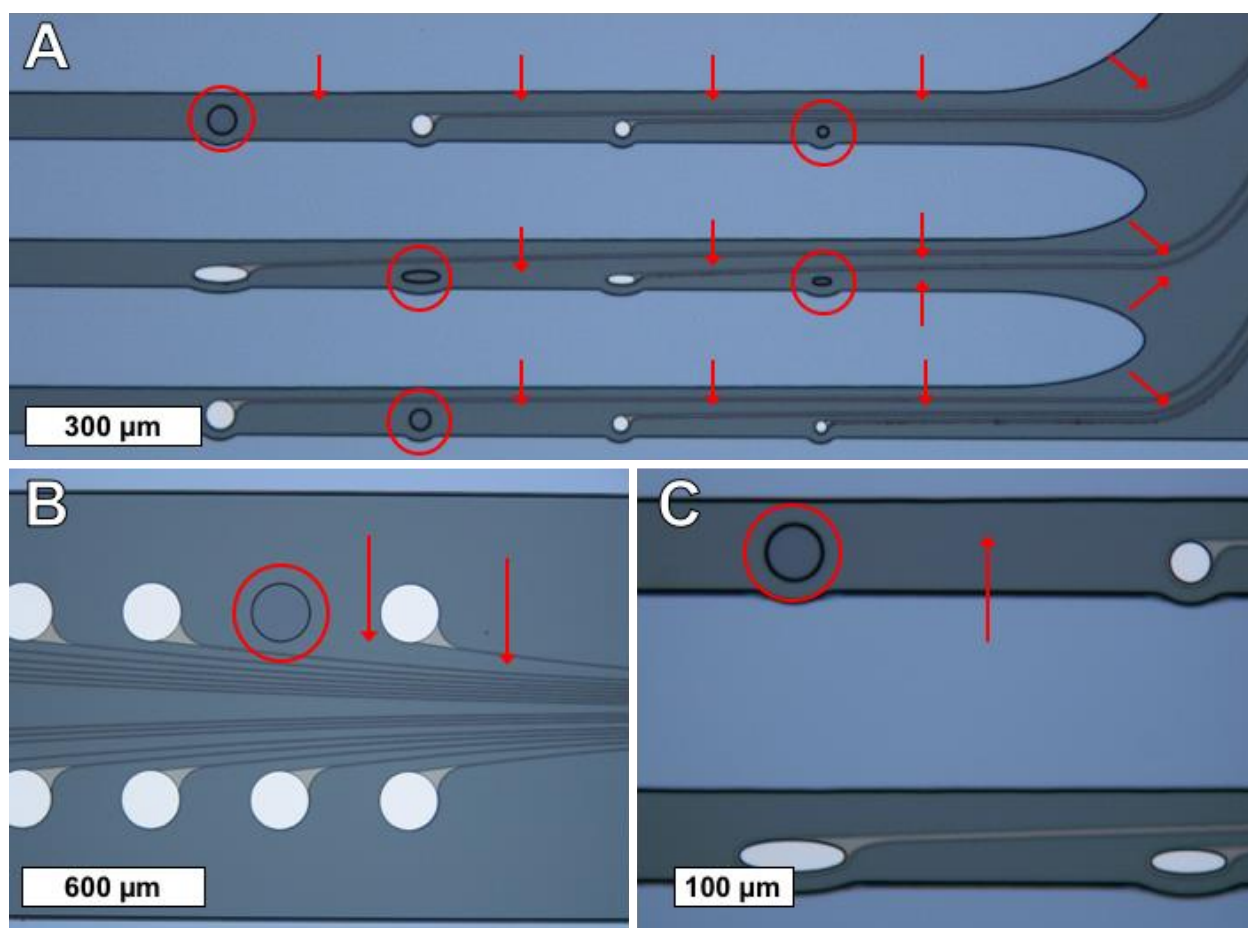

**Figure S4.** Metal delamination from devices that used only titanium as a tie-layer between noble metals and the underlying polyimide substrate. Each delamination point is highlighted in red to indicate where either a microelectrode/contact site (circle) or metallic trace (arrow) delaminated.
